# Supplementary material for: Acetylcholinesterase biosensor based on electrochemically inducing 3D graphene oxide network/multi-walled carbon nanotube composites for detection of pesticides
Source: Royal Society of Chemistry journal article supplement (doi:10.1039/c7ra08226f), 2017-01-01
Supplement: c7ra08226f1.pdf [file c7ra08226f1.pdf]

**Supplementary Materials:**

**Acetylcholinesterase biosensor based on electrochemically inducing 3D graphene oxide network/multi-walled carbon nanotubes composites for detection of pesticides**

Yanping Li, Ruixia Zhao, Lingyun Shi, Gaoyi Han\*, Yaoming Xiao

The Institute of Molecular Science, Key Laboratory of Shanxi Province for Energy

Conversion and Storage Materials, Shanxi University, Taiyuan, China 030006

---

\* Corresponding author. Tel: +86-351-7010699. Fax: +86-351-7016358.

E-mail address: [han\\_gaoyis@sxu.edu.cn](mailto:han_gaoyis@sxu.edu.cn) (Gaoyi Han)

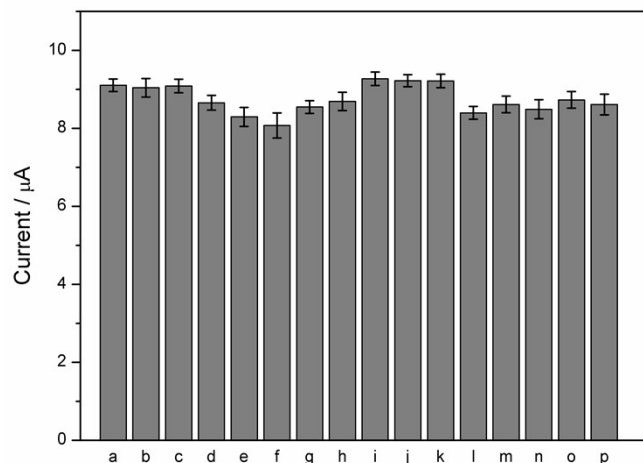

Fig. S1 Amperometric response in 0.1 mol/L PBS containing 7.5 mmol/L ATCl in the absence (a) and presence of 0.5 mmol/L glucose (b), 0.5 mmol/L oxalic acid (c), 9 nmol/L *p*-nitrophenol (d), 9 nmol/L *p*-toluenesulfonic acid (e), 9 nmol/L nitrobenzene (f), 1.8 nmol/L carbaryl (g), 1.8 nmol/L paraoxon (h) after incubated by 1.8 nmol/L carbofuran. And absence (i), presence of 0.5 mmol/L glucose (j), 0.5 mmol/L oxalic acid (k), 9 nmol/L *p*-nitrophenol (l), 9 nmol/L *p*-toluenesulfonic acid (m), 9 nmol/L nitrobenzene (n), 1.8 nmol/L carbaryl (o), 1.8 nmol/L carbofuran (p) after incubated by 1.8 nmol/L paraoxon.

Table S1 Fitting values of the equivalent circuit elements

|                                                  | bare GCE              | GO-MWCNTs/GCE         | e-GON-MWCNTs/GCE      | AChE/e-GON-MWCNTs/GCE |
|--------------------------------------------------|-----------------------|-----------------------|-----------------------|-----------------------|
| Capacitance, CPE (F/cm <sup>2</sup> )            | 4.17×10 <sup>-4</sup> | 3.34×10 <sup>-5</sup> | 3.45×10 <sup>-5</sup> | 4.42×10 <sup>-5</sup> |
| Resistance, $R_s$ (Ω cm <sup>2</sup> )           | 7.053                 | 8.16                  | 9.23                  | 9.67                  |
| Resistance, $R_{ct}$ (Ω cm <sup>2</sup> )        | 15.44                 | 59.21                 | 8.29                  | 168.34                |
| Resistive Warburg, $W_1-R$ (Ω cm <sup>2</sup> )  | 328.59                | 329.37                | 397.89                | 1145.59               |
| Capacitive Warburg, $W_1-T$ (Ω cm <sup>2</sup> ) | 1.55                  | 1.15                  | 1.65                  | 149.6                 |
